# Supplementary material
Source: publisher site journal article supplement (http://www.dovepress.com/get_supplementary_file.php?f=310633.docx)
Supplement: Supplementary file 1 [file get_supplementary_file.php]

**Supplementary figures and figure legends**

**Supplementary figure 1**

**
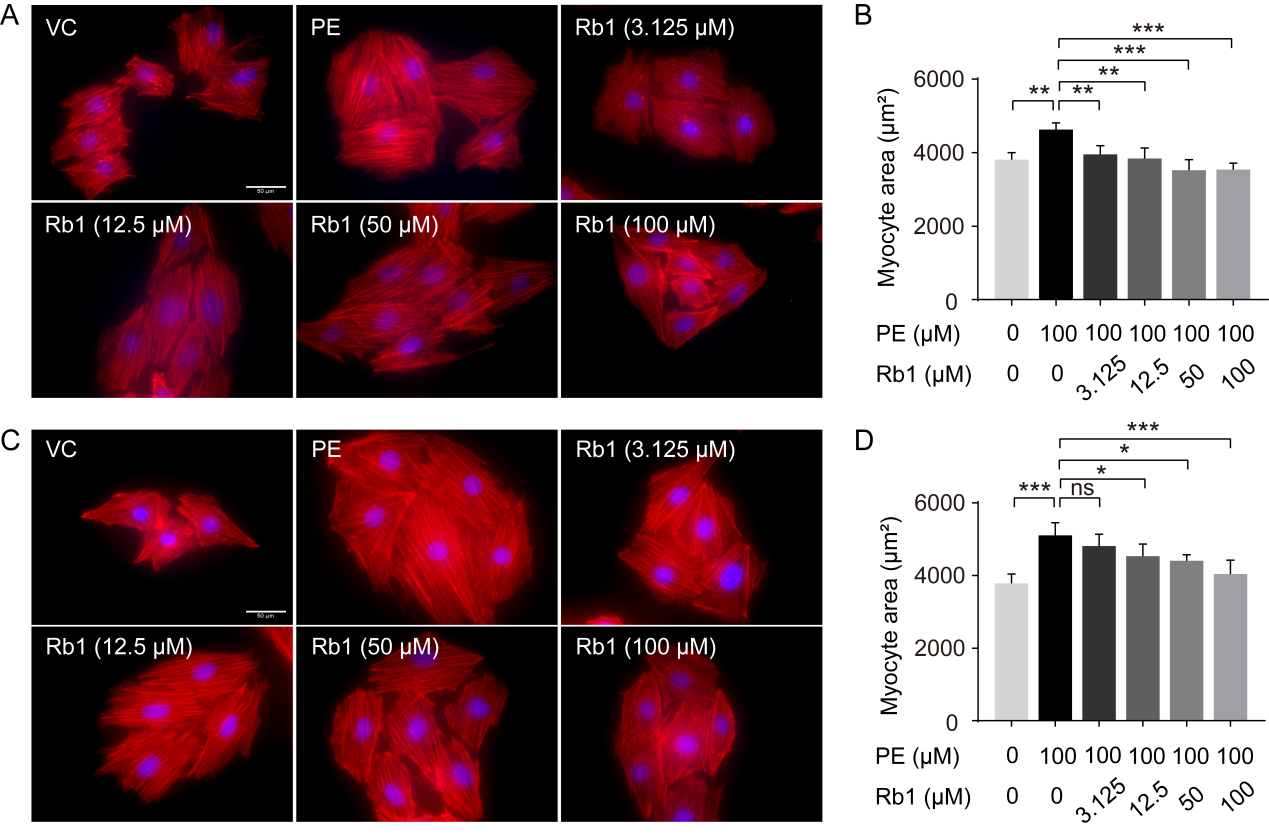
**

**Supplementary figure 1. Rb1 counteracts PE-induced cardiomyocyte hypertrophy**

H9c2 cells were pretreated with vehicle or Rb1 at the indicated concentrations for 30 min, followed by incubation in the presence or absence of PE (100 μM) for 48 h (**A** and **B**) or 72 h (**C** and **D**). **A, C**. Rhodamine phalloidin staining (in red) was performed to label myofibril in the cardiomyocytes (n=6 per group). The nuclei were labeled with DAPI (in blue). Scale bar, 50 μm. **B, D**. Quantification of the size of cardiomyocytes was performed after rhodamine phalloidin staining. Data were expressed as mean±S.E.M. * P<0.05, ** P<0.01, *** P<0.001.

**Supplementary figure 2**

**
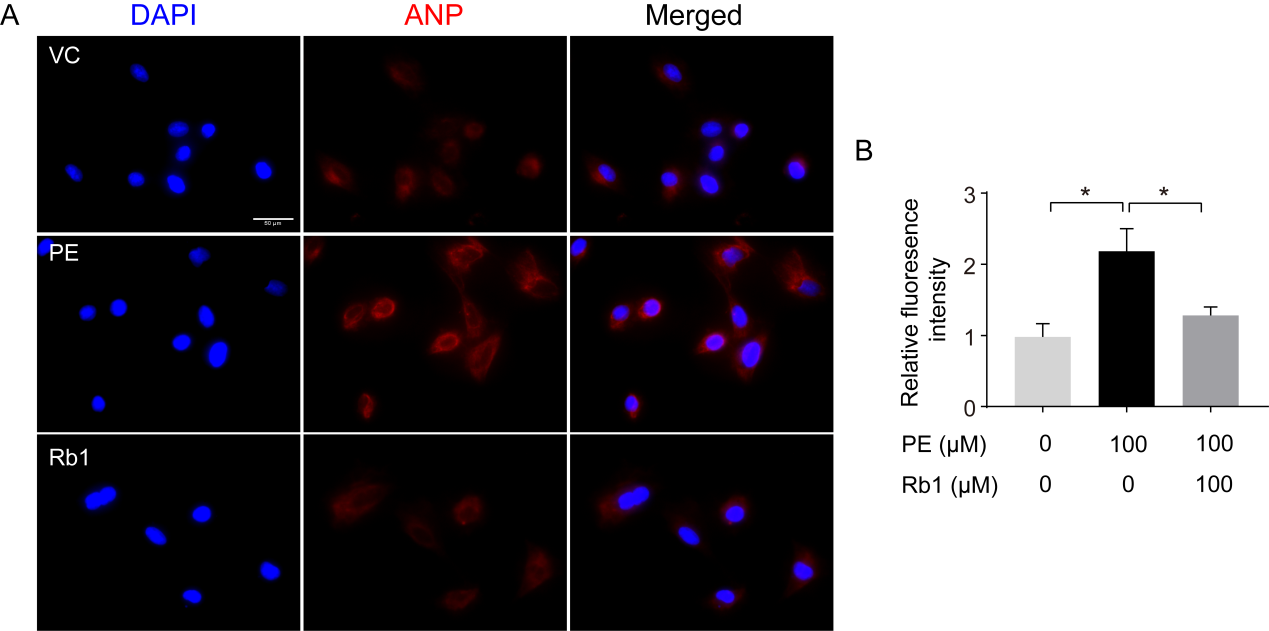
**

**Supplementary figure 2. Rb1 attenuates increase in ANP in PE-stimulated cardiomyocytes**

H9c2 cells were pretreated with vehicle or Rb1 (100 μM) for 30 min, followed by incubation in the presence or absence of PE (100 μM) for 72h. **A**. Immunostaining of ANP was performed along with DAPI (in blue) counterstaining (n=6 per group). Scale bar, 100 μm. **B**. The fluorescence intensity of intracellular ANP was quantified and relative fold change was plotted against that from the vehicle-treated cells. Data were expressed as mean±S.E.M. * P<0.05.

**Supplementary figure 3**

**
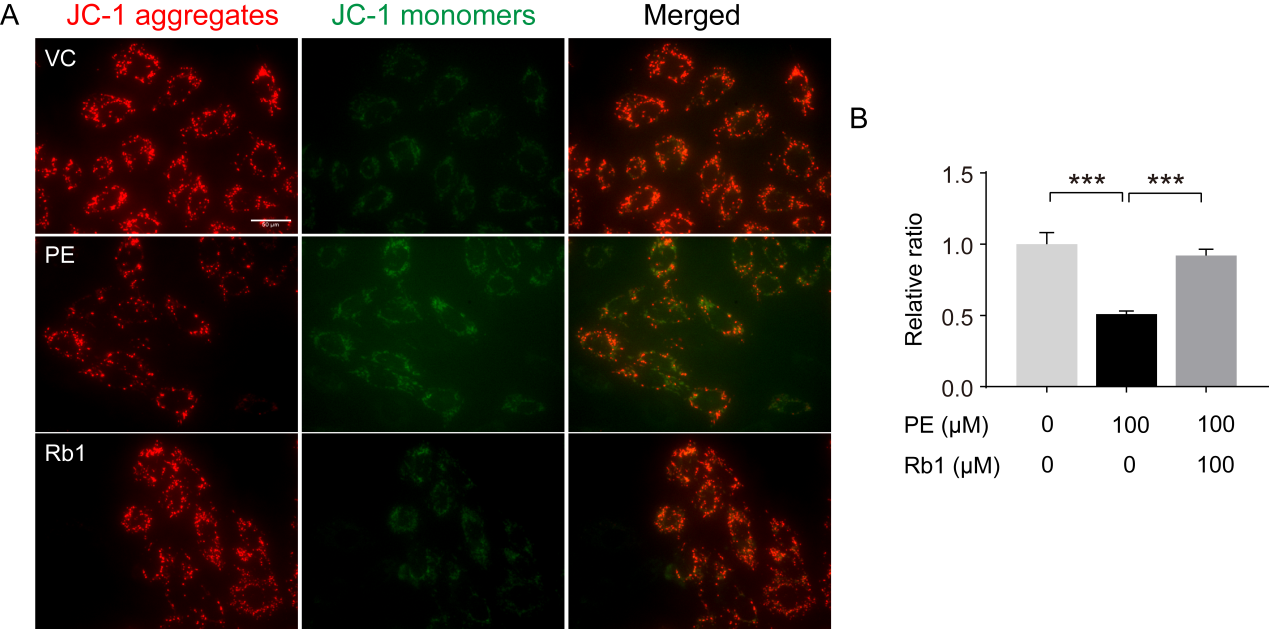
**

**Supplementary figure 3. Rb1 protects against PE-induced mitochondrial dysfunction in cardiomyocytes**

H9c2 cells were treated with vehicle or Rb1 (100 μM) for 30 min, followed by incubation in the presence or absence of PE (100 μM) for 72h. **A**. JC-1 staining was performed to assess mitochondrial membrane potential after the indicated treatments (n=5 per group). J-aggregates and J-monomers were stained in red and green, respectively. Cell nuclei were labeled with DAPI (in blue). Scale bar, 50 μm. **B**. The ratio of J-aggregates to J-monomers was calculated after fluorescence intensity measurement. Relative ratio was plotted against that from the vehicle-treated cells. Data were expressed as mean±S.E.M. *** P<0.001.

**Supplementary figure 4**


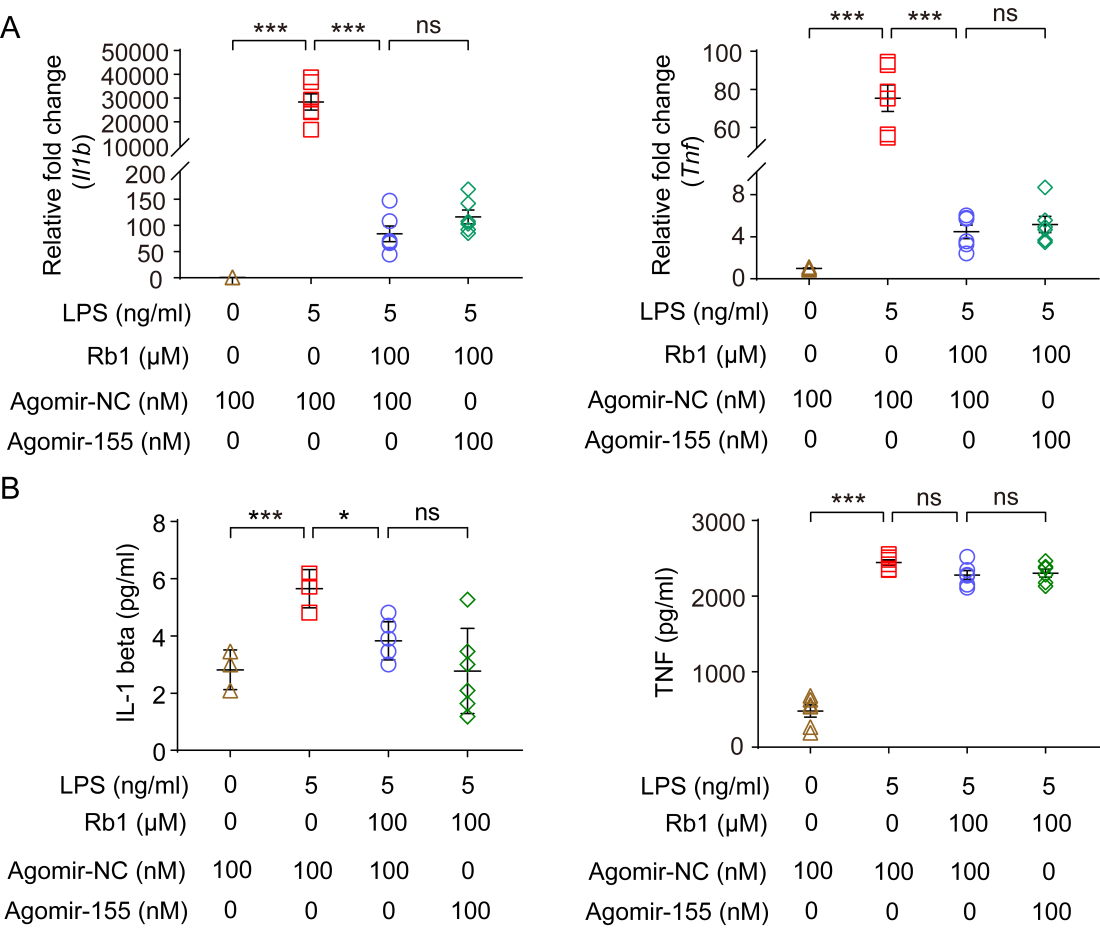


**Supplementary figure 4. MiR-155 does not appear to be involved in Rb1-conferred reduction in the expression and production of IL-1 beta and TNF in macrophages.** RAW264.7 cells transfected with agomir-155 (100 nM) or agomir-NC (100 nM) were treated with vehicle or Rb1 (100 μM), followed by incubation in the presence or absence of LPS (5 ng/ml) for 4h. **A**. Real-time qPCR was performed to examine the mRNA expression of *Il1b* and *Tnf* after the indicated treatments (n=6 per group). 18S rRNA was included for the normalization purposes. Relative fold change was plotted against that from vehicle-treated agomir-NC transfected cells. **B**. The production of IL-1 beta and TNF was analyzed by ELISA (n=6 per group). Data were expressed as mean±S.E.M. * P<0.05, *** P<0.001.
